# Supplementary material
Source: PubMed Central journal article supplement (PMC5330174)
Supplement: raon-2017-0008_sm.pdf [file raon-2017-0008_sm.pdf]

# Cancer burden in Slovenia with the time trends analysis

Vesna Zadnik, Maja Primic Zakelj, Katarina Lokar, Katja Jarm, Urska Ivanus, Tina Zagar

doi:10.1515/raon-2017-0008

## contents (click to title for quick access)

- 2 [Supplementary material 1.  
Basic epidemiologic data on cancer ALL CANCER SITES \(C00-C96\)](#)
- 3 [Supplementary material 2.  
Basic epidemiologic data on cancer SKIN, NON-MELANOMA \(C44\)](#)
- 4 [Supplementary material 3.  
Basic epidemiologic data on cancer PROSTATE \(C61\)](#)
- 5 [Supplementary material 4.  
Basic epidemiologic data on cancer COLON AND RECTUM \(C18-C20\)](#)
- 6 [Supplementary material 5.  
Basic epidemiologic data on cancer LUNG AND TRACHEA \(C33, C34\)](#)
- 7 [Supplementary material 6.  
Basic epidemiologic data on cancer BREAST \(C50\)](#)
- 8 [Supplementary material 7.  
Basic epidemiologic data on cancer MALIGNANT MELANOMA OF SKIN \(C43\)](#)
- 9 [Supplementary material 8.  
Basic epidemiologic data on cancer STOMACH \(C16\)](#)
- 10 [Supplementary material 9.  
Basic epidemiologic data on cancer HEAD AND NECK \(C00-C14, C30-C32\)](#)
- 11 [Supplementary material 10.  
Basic epidemiologic data on cancer KIDNEY \(C64, C65\)](#)
- 12 [Supplementary material 11.  
Basic epidemiologic data on cancer NON-HODGKIN´S LYMPHOMA \(C82-C85\)](#)
- 13 [Supplementary material 12.  
Basic epidemiologic data on cancer URINARY BLADDER \(C67\)](#)
- 14 [Supplementary material 13.  
Basic epidemiologic data on cancer PANCREAS \(C25\)](#)
- 15 [Supplementary material 14.  
Basic epidemiologic data on cancer CORPUS UTERI \(C54\)](#)
- 16 [Supplementary material 15.  
Basic epidemiologic data on cancer CERVIX UTERI \(C53\)](#)
- 17 [Supplementary material 16.  
Basic epidemiologic data on cancer TESTIS \(C62\)](#)
- 18 [Supplementary material 17.  
Table of incidence and crude incidence rate of rare, common and unclassified cancers, Slovenia 2004 –2013.](#)
- 22 [Supplementary material 18.  
Crude annual incidence rates of rare, common and unclassified cancers by age group with average annual change in last 10 years, Slovenia 2004–2013.](#)
- 23 [Supplementary material 19.  
Table of observed and estimated cancer incidence, Slovenia 2009–2013 and 2016.](#)

## Supplementary material 1.

## Basic epidemiologic data on cancer

## ALL CANCER SITES (C00–C96)

| INCIDENCE (average 2009–2013)                                       | Men     | Women   | Both sexes |
|---------------------------------------------------------------------|---------|---------|------------|
| Number of new cases per year                                        | 7,199   | 6,032   | 13,231     |
| Percentage of all cancers (%)                                       | /       | /       | /          |
| Frequency rank among all cancers                                    | /       | /       | /          |
| Percentage of all cancers except non-melanoma skin (%)              | /       | /       | /          |
| Risk of getting cancer before age 75 (CR) (%)                       | 37.9    | 27.0    | 32.2       |
| Crude incidence rate per 100,000                                    | 709.3   | 582.4   | 445.1      |
| Age-standardized incidence rate (ASR) per 100,000 (W)               | 400.9   | 284.0   | 225.5      |
| Estimated annual change of crude incidence rate latest 10 years (%) | 2.8     | 1.6     | 2.3        |
| Estimated annual change of ASR latest 10 years (%)                  | 0.8     | 0.6     | 0.7        |
| MORTALITY (average 2009–2013)                                       |         |         |            |
| Number of deaths per year                                           | 3,289   | 2,599   | 5,888      |
| Percentage of all cancer deaths (%)                                 | /       | /       | /          |
| Risk of dying from cancer before age 75 (CR) (%)                    | 17.0    | 9.6     | 13.1       |
| Crude mortality rate per 100,000                                    | 324.0   | 251.0   | 212.5      |
| Age-standardized mortality rate (ASR) per 100,000 (W)               | 169.2   | 94.5    | 95.7       |
| Estimated annual change of crude mortality rate latest 10 years (%) | 1.5     | 1.7     | 1.6        |
| Estimated annual change of ASR latest 10 years (%)                  | -1.2    | -0.5    | -0.8       |
| PREVALENCE (on December 31, 2013)                                   |         |         |            |
| Persons living with cancer at the end of 2013 (prevalence)          | 41,607  | 52,468  | 94,075     |
| Number of persons living with cancer per 100,000 at the end of 2013 | 4,080.5 | 5,047.6 | 4,568.7    |
| 1-year prevalence                                                   | 5,888   | 5,213   | 11,101     |
| 5-year prevalence                                                   | 16,047  | 15,103  | 31,150     |

## Crude and age-standardized rates per 100,000 population over time.

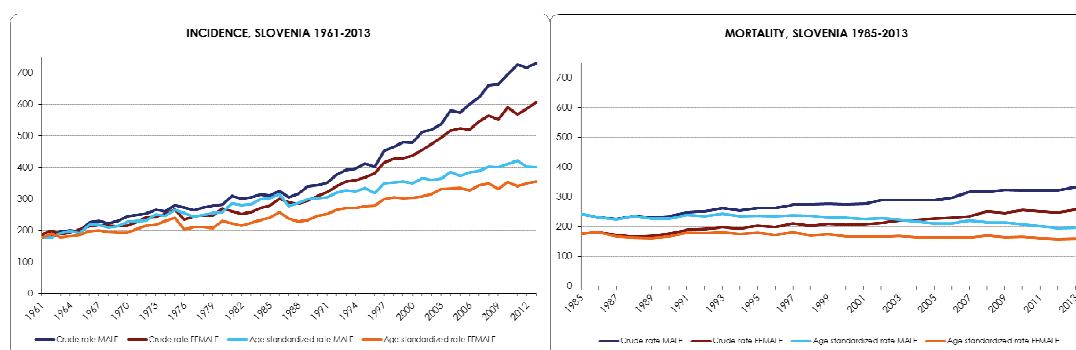

## Supplementary material 2.

## Basic epidemiologic data on cancer

## SKIN, NON-MELANOMA (C44)

| <b>INCIDENCE (average 2009–2013)</b>                                  |            |              |                   |
|-----------------------------------------------------------------------|------------|--------------|-------------------|
|                                                                       | <b>Men</b> | <b>Women</b> | <b>Both sexes</b> |
| Number of new cases per year                                          | 1,141      | 1,157        | 2,298             |
| Percentage of all cancers (%)                                         | 15.9       | 19.2         | 17.4              |
| Frequency rank among all cancers                                      | 2nd        | 2nd          | 1st               |
| Percentage of all cancers except non-melanoma skin (%)                | /          | /            | /                 |
| Risk of getting cancer before age 75 (CR) (%)                         | 6.5        | 5.0          | 5.7               |
| Crude incidence rate per 100,000                                      | 112.4      | 111.7        | 112.0             |
| Age-standardized incidence rate (ASR) per 100,000 (W)                 | 60.0       | 46.5         | 51.7              |
| Estimated annual change of crude incidence rate latest 10 years (%)   | 5.7        | 4.2          | 4.9               |
| Estimated annual change of ASR latest 10 years (%)                    | 3.2        | 3.1          | 3.2               |
| <b>MORTALITY (average 2009–2013)</b>                                  |            |              |                   |
| Number of deaths per year                                             | 16         | 18           | 34                |
| Percentage of all cancer deaths (%)                                   | 0.5        | 0.7          | 0.6               |
| Risk of dying from cancer before age 75 (CR) (%)                      | 0.05       | 0.02         | 0.03              |
| Crude mortality rate per 100,000                                      | 1.6        | 1.8          | 1.7               |
| Age-standardized mortality rate (ASR) per 100,000 (W)                 | 0.7        | 0.4          | 0.5               |
| Estimated annual change of crude mortality rate latest 10 years (%) * | /          | /            | /                 |
| Estimated annual change of ASR latest 10 years (%) *                  | /          | /            | /                 |
| <b>PREVALENCE (on December 31, 2013)</b>                              |            |              |                   |
| Persons living with cancer at the end of 2013 (prevalence)            | 11,169     | 12,532       | 23,701            |
| Number of persons living with cancer per 100,000 at the end of 2013   | 1,095.4    | 1,205.6      | 1,151.0           |
| 1-year prevalence                                                     | 1,320      | 1,308        | 2,628             |
| 5-year prevalence                                                     | 3,810      | 3,967        | 7,777             |

\* Annual changes are not calculated because of low number of deaths.

## Crude and age-standardized rates per 100,000 population over time.

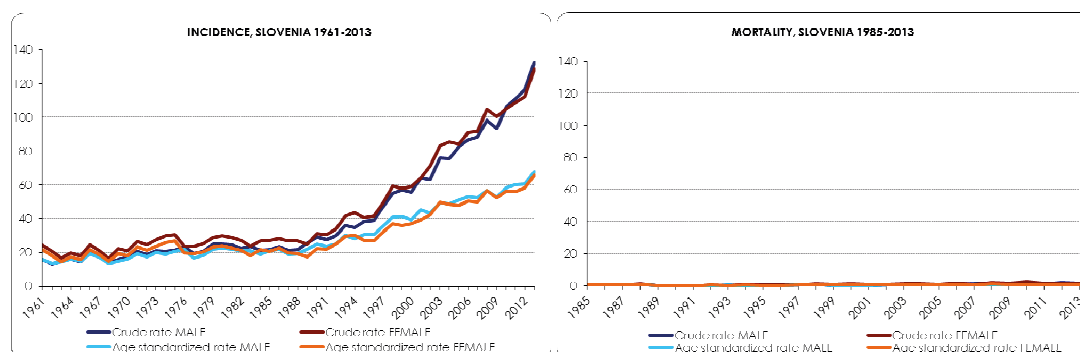

## Supplementary material 3.

## Basic epidemiologic data on cancer

## PROSTATE (C61)

| <b>INCIDENCE (average 2009–2013)</b>                                |  | <b>Men</b> |
|---------------------------------------------------------------------|--|------------|
| Number of new cases per year                                        |  | 1,454      |
| Percentage of all cancers (%)                                       |  | 20.2       |
| Frequency rank among all cancers                                    |  | 1st        |
| Percentage of all cancers except non-melanoma skin (%)              |  | 24.0       |
| Risk of getting cancer before age 75 (CR) (%)                       |  | 10.4       |
| Crude incidence rate per 100,000                                    |  | 143.3      |
| Age-standardized incidence rate (ASR) per 100,000 (W)               |  | 78.9       |
| Estimated annual change of crude incidence rate latest 10 years (%) |  | 6.2        |
| Estimated annual change of ASR latest 10 years (%)                  |  | 4.3        |
| <b>MORTALITY (average 2009–2013)</b>                                |  |            |
| Number of deaths per year                                           |  | 375        |
| Percentage of all cancer deaths (%)                                 |  | 11.4       |
| Risk of dying from cancer before age 75 (CR) (%)                    |  | 1.3        |
| Crude mortality rate per 100,000                                    |  | 37.0       |
| Age-standardized mortality rate (ASR) per 100,000 (W)               |  | 16.7       |
| Estimated annual change of crude mortality rate latest 10 years (%) |  | 2.8        |
| Estimated annual change of ASR latest 10 years (%)                  |  | - 1.2      |
| <b>PREVALENCE (on December 31, 2013)</b>                            |  |            |
| Persons living with cancer at the end of 2013 (prevalence)          |  | 10,271     |
| Number of persons living with cancer per 100,000 at the end of 2013 |  | 1,007.3    |
| 1-year prevalence                                                   |  | 1,401      |
| 5-year prevalence                                                   |  | 4,687      |

## Crude and age-standardized rates per 100,000 men over time.

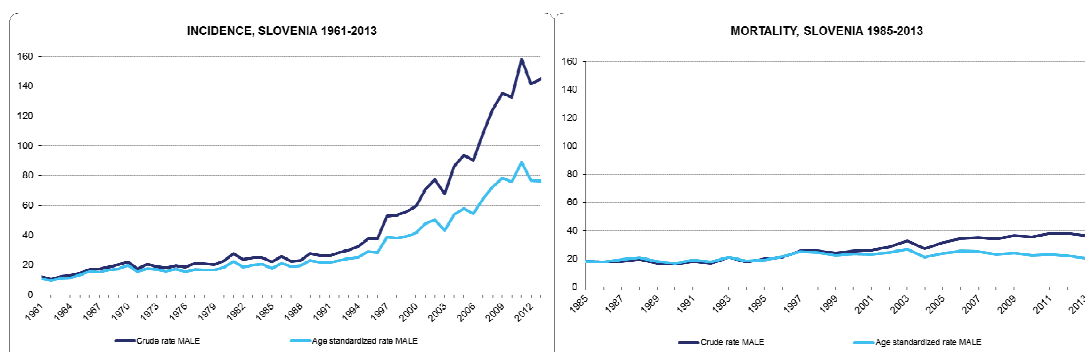

## Supplementary material 4.

## Basic epidemiologic data on cancer

## COLON AND RECTUM (C18–C20)

| <b>INCIDENCE (average 2009–2013)</b>                                |            |              |                   |
|---------------------------------------------------------------------|------------|--------------|-------------------|
|                                                                     | <b>Men</b> | <b>Women</b> | <b>Both sexes</b> |
| Number of new cases per year                                        | 939        | 630          | 1,569             |
| Percentage of all cancers (%)                                       | 13.0       | 10.4         | 11.9              |
| Frequency rank among all cancers                                    | 3rd        | 3rd          | 2nd               |
| Percentage of all cancers except non-melanoma skin (%)              | 15.5       | 12.9         | 14.4              |
| Risk of getting cancer before age 75 (CR) (%)                       | 6.1        | 3.1          | 4.5               |
| Crude incidence rate per 100,000                                    | 92.4       | 60.8         | 76.4              |
| Age-standardized incidence rate (ASR) per 100,000 (W)               | 51.1       | 26.6         | 37.6              |
| Estimated annual change of crude incidence rate latest 10 years (%) | 2.7        | 0.7          | 1.9               |
| Estimated annual change of ASR latest 10 years (%)                  | 0.7        | 0.1          | 0.6               |
| <b>MORTALITY (average 2009–2013)</b>                                |            |              |                   |
| Number of deaths per year                                           | 448        | 333          | 781               |
| Percentage of all cancer deaths (%)                                 | 13.6       | 12.8         | 13.3              |
| Risk of dying from cancer before age 75 (CR) (%)                    | 2.4        | 1.1          | 1.7               |
| Crude mortality rate per 100,000                                    | 44.1       | 32.1         | 38.0              |
| Age-standardized mortality rate (ASR) per 100,000 (W)               | 22.3       | 10.7         | 15.6              |
| Estimated annual change of crude mortality rate latest 10 years (%) | 2.2        | 1.0          | 1.7               |
| Estimated annual change of ASR latest 10 years (%)                  | -0.8       | -1.2         | -0.8              |
| <b>PREVALENCE (on December 31, 2013)</b>                            |            |              |                   |
| Persons living with cancer at the end of 2013 (prevalence)          | 5,927      | 4,765        | 10,692            |
| Number of persons living with cancer per 100,000 at the end of 2013 | 581.3      | 458.4        | 519.3             |
| 1-year prevalence                                                   | 679        | 443          | 1,122             |
| 5-year prevalence                                                   | 2,429      | 1,561        | 3,990             |

## Crude and age-standardized rates per 100,000 population over time.

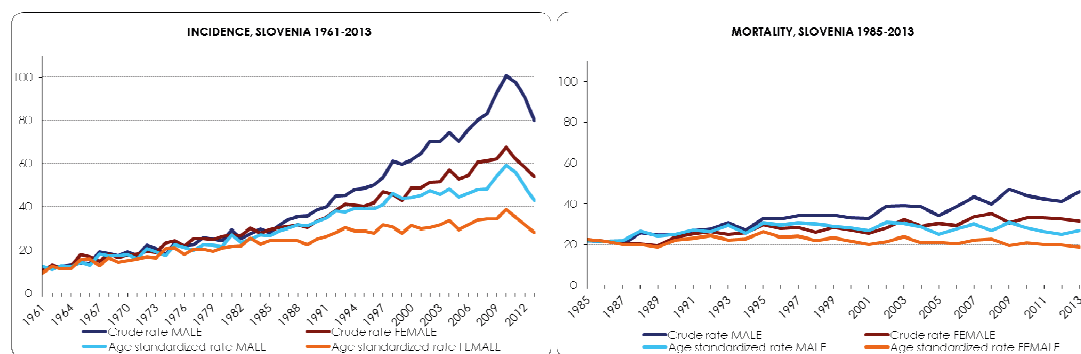

## Supplementary material 5.

## Basic epidemiologic data on cancer

## LUNG AND TRACHEA (C33, C34)

| <b>INCIDENCE (average 2009–2013)</b>                                |            |              |                   |
|---------------------------------------------------------------------|------------|--------------|-------------------|
|                                                                     | <b>Men</b> | <b>Women</b> | <b>Both sexes</b> |
| Number of new cases per year                                        | 858        | 391          | 1,249             |
| Percentage of all cancers (%)                                       | 11.9       | 6.5          | 9.4               |
| Frequency rank among all cancers                                    | 4th        | 4th          | 4th               |
| Percentage of all cancers except non-melanoma skin (%)              | 14.2       | 8.0          | 11.4              |
| Risk of getting cancer before age 75 (CR) (%)                       | 5.8        | 2.2          | 3.9               |
| Crude incidence rate per 100.000                                    | 84.5       | 37.7         | 60.9              |
| Age-standardized incidence rate (ASR) per 100.000 (W)               | 47.0       | 18.2         | 31.2              |
| Estimated annual change of crude incidence rate latest 10 years (%) | - 1.4      | 3.9          | 0.2               |
| Estimated annual change of ASR latest 10 years (%)                  | - 3.3      | 3.3          | - 1.3             |
| <b>MORTALITY (average 2009–2013)</b>                                |            |              |                   |
| Number of deaths per year                                           | 775        | 327          | 1,102             |
| Percentage of all cancer deaths (%)                                 | 23.6       | 12.6         | 18.7              |
| Risk of dying from cancer before age 75 (CR) (%)                    | 4.9        | 1.6          | 3.2               |
| Crude mortality rate per 100.000                                    | 76.3       | 31.6         | 53.7              |
| Age-standardized mortality rate (ASR) per 100.000 (W)               | 41.2       | 13.8         | 26.0              |
| Estimated annual change of crude mortality rate latest 10 years (%) | - 1.1      | 3.4          | 0.2               |
| Estimated annual change of ASR latest 10 years (%)                  | - 3.2      | 2.3          | - 1.6             |
| <b>PREVALENCE (on December 31, 2013)</b>                            |            |              |                   |
| Persons living with cancer at the end of 2013 (prevalence)          | 1,794      | 989          | 2,783             |
| Number of persons living with cancer per 100,000 at the end of 2013 | 175.9      | 95.1         | 135.2             |
| 1-year prevalence                                                   | 497        | 281          | 778               |
| 5-year prevalence                                                   | 632        | 390          | 1,022             |

## Crude and age-standardized rates per 100,000 population over time.

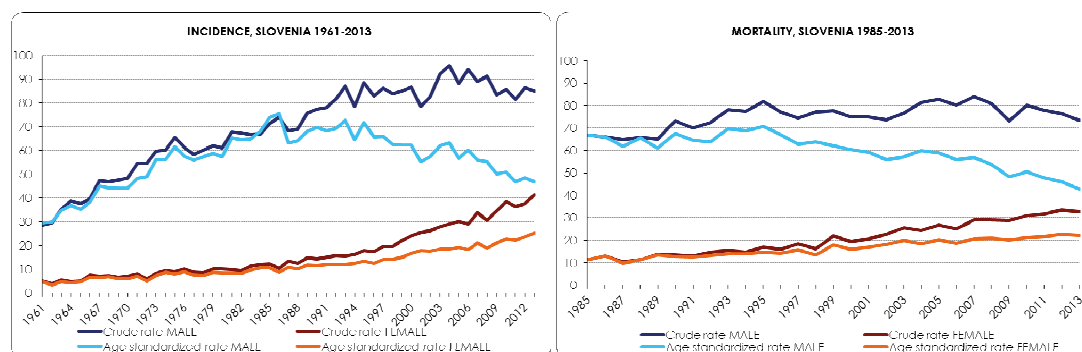

## Supplementary material 6.

## Basic epidemiologic data on cancer

## BREAST (C50)

| INCIDENCE (average 2009–2013)                                       |  | Women   |
|---------------------------------------------------------------------|--|---------|
| Number of new cases per year                                        |  | 1,228   |
| Percentage of all cancers (%)                                       |  | 20.4    |
| Frequency rank among all cancers                                    |  | 1st     |
| Percentage of all cancers except non-melanoma skin (%)              |  | 25.2    |
| Risk of getting cancer before age 75 (CR) (%)                       |  | 7.2     |
| Crude incidence rate per 100,000                                    |  | 118.5   |
| Age-standardized incidence rate (ASR) per 100,000 (W)               |  | 65.9    |
| Estimated annual change of crude incidence rate latest 10 years (%) |  | 1.3     |
| Estimated annual change of ASR latest 10 years (%)                  |  | 0.7     |
| MORTALITY (average 2009–2013)                                       |  |         |
| Number of deaths per year                                           |  | 413     |
| Percentage of all cancer deaths (%)                                 |  | 15.9    |
| Risk of dying from cancer before age 75 (CR) (%)                    |  | 1.6     |
| Crude mortality rate per 100,000                                    |  | 39.9    |
| Age-standardized mortality rate (ASR) per 100,000 (W)               |  | 15.7    |
| Estimated annual change of crude mortality rate latest 10 years (%) |  | 0.4     |
| Estimated annual change of ASR latest 10 years (%)                  |  | -2.3    |
| PREVALENCE (on December 31, 2013)                                   |  |         |
| Persons living with cancer at the end of 2013 (prevalence)          |  | 15,294  |
| Number of persons living with cancer per 100,000 at the end of 2013 |  | 1,471.3 |
| 1-year prevalence                                                   |  | 1,220   |
| 5-year prevalence                                                   |  | 4,140   |

## Crude and age-standardized rates per 100,000 women over time.

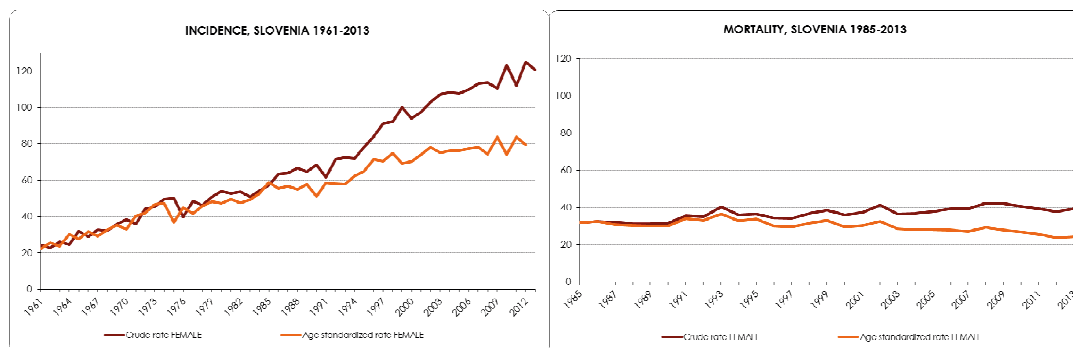

## Supplementary material 7.

## Basic epidemiologic data on cancer

## MALIGNANT MELANOMA OF SKIN (C43)

| INCIDENCE (average 2009–2013)                                       |  | Men   | Women | Both sexes |
|---------------------------------------------------------------------|--|-------|-------|------------|
| Number of new cases per year                                        |  | 246   | 249   | 495        |
| Percentage of all cancers (%)                                       |  | 3.4   | 4.1   | 3.7        |
| Frequency rank among all cancers                                    |  | 7th   | 6th   | 6th        |
| Percentage of all cancers except non-melanoma skin (%)              |  | 4.1   | 5.1   | 4.5        |
| Risk of getting cancer before age 75 (CR) (%)                       |  | 1.7   | 1.5   | 1.6        |
| Crude incidence rate per 100,000                                    |  | 24.3  | 24.0  | 24.1       |
| Age-standardized incidence rate (ASR) per 100,000 (W)               |  | 15.1  | 14.6  | 14.6       |
| Estimated annual change of crude incidence rate latest 10 years (%) |  | 6.1   | 3.2   | 4.6        |
| Estimated annual change of ASR latest 10 years (%)                  |  | 4.7   | 2.7   | 3.7        |
| MORTALITY (average 2009–2013)                                       |  |       |       |            |
| Number of deaths per year                                           |  | 67    | 57    | 124        |
| Percentage of all cancer deaths (%)                                 |  | 2.0   | 2.2   | 2.1        |
| Risk of dying from cancer before age 75 (CR) (%)                    |  | 0.4   | 0.3   | 0.3        |
| Crude mortality rate per 100,000                                    |  | 6.6   | 5.5   | 6.1        |
| Age-standardized mortality rate (ASR) per 100,000 (W)               |  | 3.7   | 2.4   | 3.0        |
| Estimated annual change of crude mortality rate latest 10 years (%) |  | 5.0   | 2.3   | 3.7        |
| Estimated annual change of ASR latest 10 years (%)                  |  | 2.4   | 0.8   | 1.4        |
| PREVALENCE (on December 31, 2013)                                   |  |       |       |            |
| Persons living with cancer at the end of 2013 (prevalence)          |  | 2,274 | 2,989 | 5,263      |
| Number of persons living with cancer per 100,000 at the end of 2013 |  | 223.0 | 287.6 | 255.6      |
| 1-year prevalence                                                   |  | 267   | 245   | 512        |
| 5-year prevalence                                                   |  | 787   | 854   | 1,641      |

## Crude and age-standardized rates per 100,000 population over time.

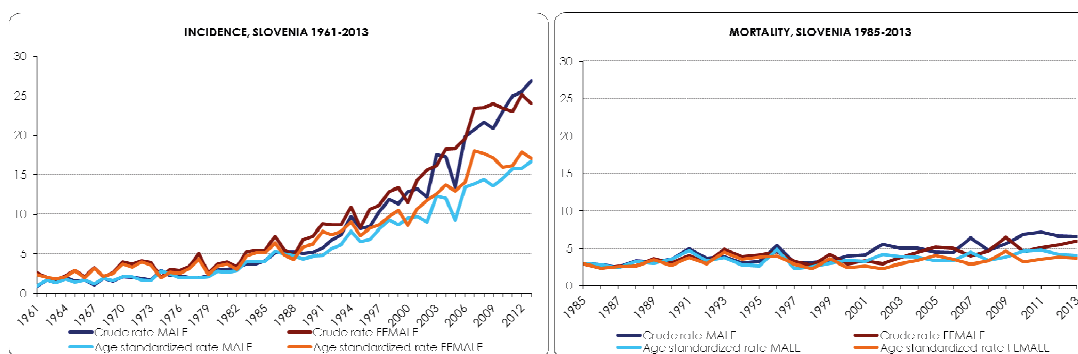



## Supplementary material 8.

## Basic epidemiologic data on cancer

## STOMACH (C16)

| <b>INCIDENCE (average 2009–2013)</b>                                |            |              |                   |
|---------------------------------------------------------------------|------------|--------------|-------------------|
|                                                                     | <b>Men</b> | <b>Women</b> | <b>Both sexes</b> |
| Number of new cases per year                                        | 295        | 184          | 479               |
| Percentage of all cancers (%)                                       | 4.1        | 3.1          | 3.6               |
| Frequency rank among all cancers                                    | 6th        | 7th          | 7th               |
| Percentage of all cancers except non-melanoma skin (%)              | 4.9        | 3.8          | 4.4               |
| Risk of getting cancer before age 75 (CR) (%)                       | 1.8        | 0.7          | 1.2               |
| Crude incidence rate per 100,000                                    | 29.1       | 17.8         | 23.4              |
| Age-standardized incidence rate (ASR) per 100,000 (W)               | 15.6       | 7.1          | 10.8              |
| Estimated annual change of crude incidence rate latest 10 years (%) | -0.5       | -0.1         | -0.3              |
| Estimated annual change of ASR latest 10 years (%)                  | -2.7       | -1.2         | -1.9              |
| <b>MORTALITY (average 2009–2013)</b>                                |            |              |                   |
| Number of deaths per year                                           | 221        | 148          | 368               |
| Percentage of all cancer deaths (%)                                 | 6.7        | 5.7          | 6.3               |
| Risk of dying from cancer before age 75 (CR) (%)                    | 1.2        | 0.5          | 0.8               |
| Crude mortality rate per 100,000                                    | 21.7       | 14.2         | 17.9              |
| Age-standardized mortality rate (ASR) per 100,000 (W)               | 11.2       | 5.0          | 7.6               |
| Estimated annual change of crude mortality rate latest 10 years (%) | -1.0       | 1.0          | -0.2              |
| Estimated annual change of ASR latest 10 years (%)                  | -3.7       | -0.8         | -2.4              |
| <b>PREVALENCE (on December 31, 2013)</b>                            |            |              |                   |
| Persons living with cancer at the end of 2013 (prevalence)          | 1,134      | 818          | 1,952             |
| Number of persons living with cancer per 100,000 at the end of 2013 | 111.2      | 78.7         | 94.8              |
| 1-year prevalence                                                   | 207        | 111          | 318               |
| 5-year prevalence                                                   | 352        | 215          | 567               |

## Crude and age-standardized rates per 100,000 population over time.

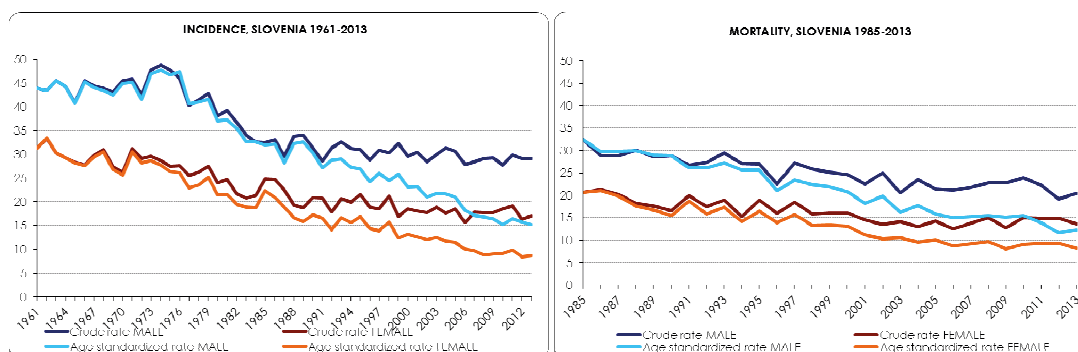

Supplementary material 9.

## Basic epidemiologic data on cancer HEAD AND NECK (C00-C14, C30-C32)

| <b>INCIDENCE (average 2009–2013)</b>                                |  | <b>Men</b> | <b>Women</b> | <b>Both sexes</b> |
|---------------------------------------------------------------------|--|------------|--------------|-------------------|
| Number of new cases per year                                        |  | 375        | 92           | 467               |
| Percentage of all cancers (%)                                       |  | 5.2        | 1.5          | 3.5               |
| Frequency rank among all cancers                                    |  | 5th        | 14th         | 8th               |
| Percentage of all cancers except non-melanoma skin (%)              |  | 6.2        | 1.9          | 4.3               |
| Risk of getting cancer before age 75 (CR) (%)                       |  | 2.7        | 0.5          | 1.6               |
| Crude incidence rate per 100,000                                    |  | 36.8       | 8.9          | 22.7              |
| Age-standardized incidence rate (ASR) per 100,000 (W)               |  | 22.2       | 4.7          | 12.9              |
| Estimated annual change of crude incidence rate latest 10 years (%) |  | -0.4       | 0.2          | -0.3              |
| Estimated annual change of ASR latest 10 years (%)                  |  | -2.0       | -0.2         | -1.5              |
| <b>MORTALITY (average 2009–2013)</b>                                |  |            |              |                   |
| Number of deaths per year                                           |  | 192        | 37           | 229               |
| Percentage of all cancer deaths (%)                                 |  | 5.8        | 1.4          | 3.9               |
| Risk of dying from cancer before age 75 (CR) (%)                    |  | 1.3        | 0.2          | 0.7               |
| Crude mortality rate per 100,000                                    |  | 19.0       | 3.4          | 11.1              |
| Age-standardized mortality rate (ASR) per 100,000 (W)               |  | 10.8       | 1.6          | 6.0               |
| Estimated annual change of crude mortality rate latest 10 years (%) |  | 1.6        | 3.4          | 1.7               |
| Estimated annual change of ASR latest 10 years (%)                  |  | -0.4       | 2.5          | 0.4               |
| <b>PREVALENCE (on December 31, 2013)</b>                            |  |            |              |                   |
| Persons living with cancer at the end of 2013 (prevalence)          |  | 2,471      | 811          | 3,282             |
| Number of persons living with cancer per 100,000 at the end of 2013 |  | 242.3      | 78.0         | 159.4             |
| 1-year prevalence                                                   |  | 308        | 78           | 386               |
| 5-year prevalence                                                   |  | 798        | 228          | 1,026             |

Crude and age-standardized rates per 100,000 population over time.

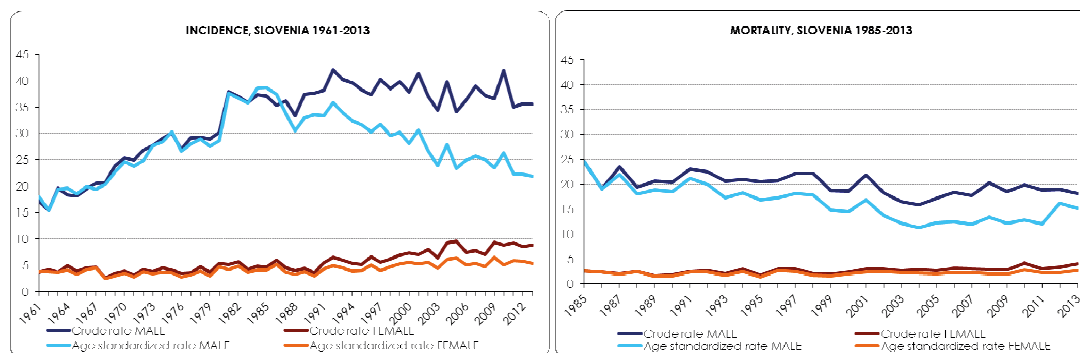

## Supplementary material 10.

## Basic epidemiologic data on cancer

## KIDNEY (C64, C65)

| INCIDENCE (average 2009–2013)                                       | Men   | Women | Both sexes |
|---------------------------------------------------------------------|-------|-------|------------|
| Number of new cases per year                                        | 243   | 120   | 363        |
| Percentage of all cancers (%)                                       | 3.4   | 2.0   | 2.7        |
| Frequency rank among all cancers                                    | 8th   | 12th  | 9th        |
| Percentage of all cancers except non-melanoma skin (%)              | 4.0   | 2.5   | 3.3        |
| Risk of getting cancer before age 75 (CR) (%)                       | 1.7   | 0.6   | 1.1        |
| Crude incidence rate per 100,000                                    | 23.9  | 11.6  | 17.7       |
| Age-standardized incidence rate (ASR) per 100,000 (W)               | 13.9  | 5.3   | 9.3        |
| Estimated annual change of crude incidence rate latest 10 years (%) | 3.5   | 1.3   | 2.8        |
| Estimated annual change of ASR latest 10 years (%)                  | 1.3   | -0.9  | 0.6        |
| MORTALITY (average 2009–2013)                                       |       |       |            |
| Number of deaths per year                                           | 103   | 58    | 160        |
| Percentage of all cancer deaths (%)                                 | 3.1   | 2.2   | 2.7        |
| Risk of dying from cancer before age 75 (CR) (%)                    | 0.6   | 0.2   | 0.4        |
| Crude mortality rate per 100,000                                    | 10.1  | 5.6   | 7.8        |
| Age-standardized mortality rate (ASR) per 100,000 (W)               | 5.4   | 1.8   | 3.4        |
| Estimated annual change of crude mortality rate latest 10 years (%) | 4.7   | 1.2   | 3.6        |
| Estimated annual change of ASR latest 10 years (%)                  | 1.9   | -2.7  | 0.9        |
| PREVALENCE (on December 31, 2013)                                   |       |       |            |
| Persons living with cancer at the end of 2013 (prevalence)          | 1,723 | 1,023 | 2,746      |
| Number of persons living with cancer per 100,000 at the end of 2013 | 169.0 | 98.4  | 133.4      |
| 1-year prevalence                                                   | 201   | 116   | 317        |
| 5-year prevalence                                                   | 592   | 266   | 858        |

## Crude and age-standardized rates per 100,000 population over time.

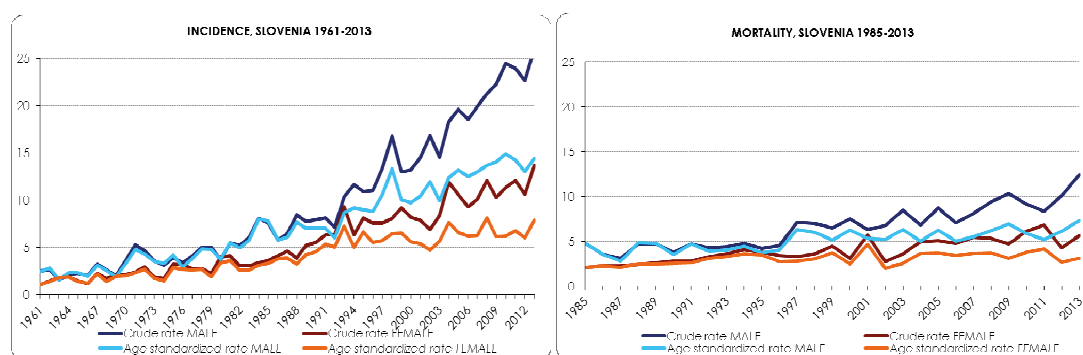

## Supplementary material 11.

## Basic epidemiologic data on cancer

## NON-HODGKIN'S LYMPHOMA (C82–C85)

| INCIDENCE (average 2009–2013)                                       | Men   | Women | Both sexes |
|---------------------------------------------------------------------|-------|-------|------------|
| Number of new cases per year                                        | 169   | 167   | 336        |
| Percentage of all cancers (%)                                       | 2.3   | 2.8   | 2.5        |
| Frequency rank among all cancers                                    | 11th  | 9th   | 11th       |
| Percentage of all cancers except non-melanoma skin (%)              | 2.8   | 3.4   | 3.1        |
| Risk of getting cancer before age 75 (CR) (%)                       | 1.1   | 0.8   | 0.9        |
| Crude incidence rate per 100,000                                    | 16.6  | 16.2  | 16.4       |
| Age-standardized incidence rate (ASR) per 100,000 (W)               | 10.0  | 7.5   | 8.6        |
| Estimated annual change of crude incidence rate latest 10 years (%) | 5.3   | 3.9   | 4.6        |
| Estimated annual change of ASR latest 10 years (%)                  | 3.0   | 2.0   | 2.5        |
| MORTALITY (average 2009–2013)                                       |       |       |            |
| Number of deaths per year                                           | 61    | 69    | 130        |
| Percentage of all cancer deaths (%)                                 | 1.8   | 2.7   | 2.2        |
| Risk of dying from cancer before age 75 (CR) (%)                    | 0.3   | 0.2   | 0.3        |
| Crude mortality rate per 100,000                                    | 6.0   | 6.7   | 6.3        |
| Age-standardized mortality rate (ASR) per 100,000 (W)               | 3.1   | 2.2   | 2.6        |
| Estimated annual change of crude mortality rate latest 10 years (%) | 0.9   | 4.0   | 2.4        |
| Estimated annual change of ASR latest 10 years (%)                  | -2.6  | 0.2   | -0.6       |
| PREVALENCE (on December 31, 2013)                                   |       |       |            |
| Persons living with cancer at the end of 2013 (prevalence)          | 1,296 | 1,353 | 2,649      |
| Number of persons living with cancer per 100,000 at the end of 2013 | 127.1 | 130.2 | 128.6      |
| 1-year prevalence                                                   | 156   | 164   | 320        |
| 5-year prevalence                                                   | 435   | 415   | 850        |

## Crude and age-standardized rates per 100,000 population over time.

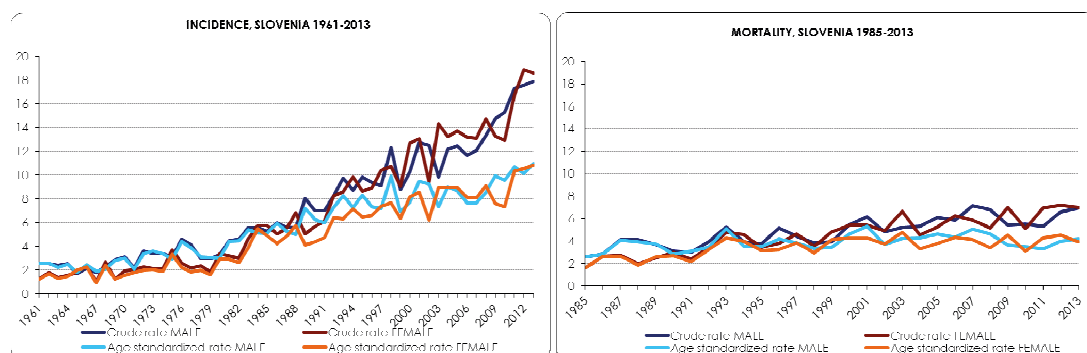

## Supplementary material 12.

## Basic epidemiologic data on cancer

## URINARY BLADDER (C67)

| <b>INCIDENCE (average 2009–2013)</b>                                |  | <b>Men</b> | <b>Women</b> | <b>Both sexes</b> |
|---------------------------------------------------------------------|--|------------|--------------|-------------------|
| Number of new cases per year                                        |  | 225        | 82           | 307               |
| Percentage of all cancers (%)                                       |  | 3.1        | 1.4          | 2.3               |
| Frequency rank among all cancers                                    |  | 9th        | 15th         | 13th              |
| Percentage of all cancers except non-melanoma skin (%)              |  | 3.7        | 1.7          | 2.8               |
| Risk of getting cancer before age 75 (CR) (%)                       |  | 1.3        | 0.3          | 0.8               |
| Crude incidence rate per 100,000                                    |  | 22.2       | 7.9          | 15.0              |
| Age-standardized incidence rate (ASR) per 100,000 (W)               |  | 11.4       | 2.9          | 6.5               |
| Estimated annual change of crude incidence rate latest 10 years (%) |  | 1.4        | 2.2          | 1.6               |
| Estimated annual change of ASR latest 10 years (%)                  |  | - 1.5      | 0.9          | - 0.8             |
| <b>MORTALITY (average 2009–2013)</b>                                |  |            |              |                   |
| Number of deaths per year                                           |  | 126        | 55           | 181               |
| Percentage of all cancer deaths (%)                                 |  | 3.8        | 2.1          | 3.1               |
| Risk of dying from cancer before age 75 (CR) (%)                    |  | 0.5        | 0.2          | 0.3               |
| Crude mortality rate per 100,000                                    |  | 12.4       | 5.3          | 8.8               |
| Age-standardized mortality rate (ASR) per 100,000 (W)               |  | 5.9        | 1.6          | 3.3               |
| Estimated annual change of crude mortality rate latest 10 years (%) |  | 2.7        | 5.3          | 3.3               |
| Estimated annual change of ASR latest 10 years (%)                  |  | - 0.9      | 3.1          | 0.4               |
| <b>PREVALENCE (on December 31, 2013)</b>                            |  |            |              |                   |
| Persons living with cancer at the end of 2013 (prevalence)          |  | 1,363      | 449          | 1,812             |
| Number of persons living with cancer per 100,000 at the end of 2013 |  | 133.7      | 43.2         | 88.0              |
| 1-year prevalence                                                   |  | 199        | 73           | 272               |
| 5-year prevalence                                                   |  | 493        | 135          | 628               |

## Crude and age-standardized rates per 100,000 population over time.

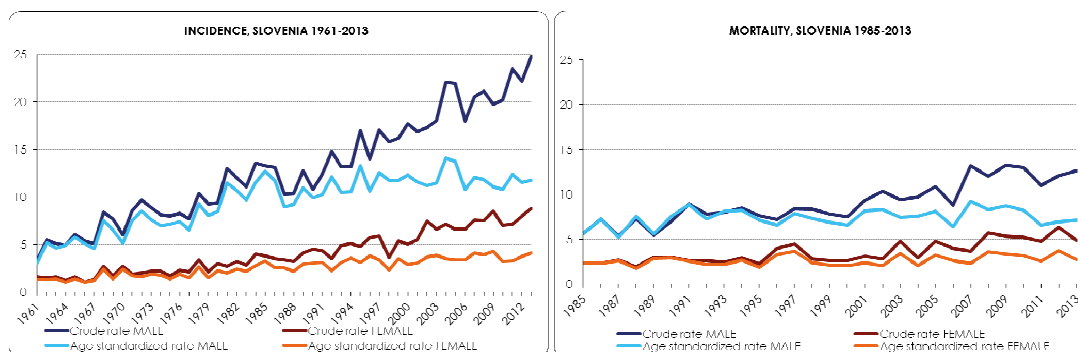

## Supplementary material 13.

## Basic epidemiologic data on cancer

## PANCREAS (C25)

| <b>INCIDENCE (average 2009–2013)</b>                                |  | <b>Men</b> | <b>Women</b> | <b>Both sexes</b> |
|---------------------------------------------------------------------|--|------------|--------------|-------------------|
| Number of new cases per year                                        |  | 171        | 175          | 346               |
| Percentage of all cancers (%)                                       |  | 2.4        | 2.9          | 2.6               |
| Frequency rank among all cancers                                    |  | 10th       | 8th          | 10th              |
| Percentage of all cancers except non-melanoma skin (%)              |  | 2.8        | 3.6          | 3.2               |
| Risk of getting cancer before age 75 (CR) (%)                       |  | 1.1        | 0.7          | 0.9               |
| Crude incidence rate per 100,000                                    |  | 16.9       | 16.9         | 16.9              |
| Age-standardized incidence rate (ASR) per 100,000 (W)               |  | 9.1        | 6.1          | 7.5               |
| Estimated annual change of crude incidence rate latest 10 years (%) |  | 4.0        | 1.6          | 2.7               |
| Estimated annual change of ASR latest 10 years (%)                  |  | 1.1        | -0.5         | 0.1               |
| <b>MORTALITY (average 2009–2013)</b>                                |  |            |              |                   |
| Number of deaths per year                                           |  | 174        | 182          | 356               |
| Percentage of all cancer deaths (%)                                 |  | 5.3        | 7.0          | 6.0               |
| Risk of dying from cancer before age 75 (CR) (%)                    |  | 1.1        | 0.7          | 0.9               |
| Crude mortality rate per 100,000                                    |  | 17.1       | 17.6         | 17.3              |
| Age-standardized mortality rate (ASR) per 100,000 (W)               |  | 9.1        | 6.1          | 7.5               |
| Estimated annual change of crude mortality rate latest 10 years (%) |  | 4.8        | 3.3          | 4.0               |
| Estimated annual change of ASR latest 10 years (%)                  |  | 1.7        | 1.4          | 1.2               |
| <b>PREVALENCE (on December 31, 2013)</b>                            |  |            |              |                   |
| Persons living with cancer at the end of 2013 (prevalence)          |  | 159        | 154          | 313               |
| Number of persons living with cancer per 100,000 at the end of 2013 |  | 15.6       | 14.8         | 15.2              |
| 1-year prevalence                                                   |  | 76         | 70           | 146               |
| 5-year prevalence                                                   |  | 50         | 46           | 96                |

## Crude and age-standardized rates per 100,000 population over time.

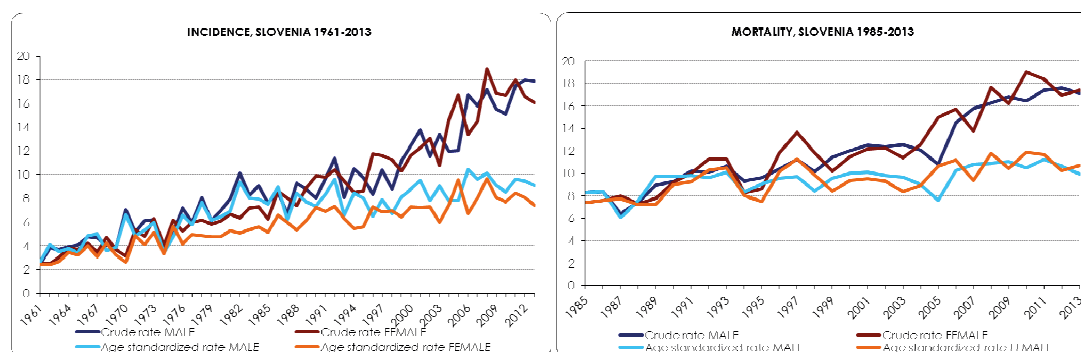

## Supplementary material 14.

## Basic epidemiologic data on cancer

### CORPUS UTERI (C54)

| INCIDENCE (average 2009–2013)                                       |  | Women |
|---------------------------------------------------------------------|--|-------|
| Number of new cases per year                                        |  | 313   |
| Percentage of all cancers (%)                                       |  | 5.2   |
| Frequency rank among all cancers                                    |  | 5th   |
| Percentage of all cancers except non-melanoma skin (%)              |  | 6.4   |
| Risk of getting cancer before age 75 (CR) (%)                       |  | 1.9   |
| Crude incidence rate per 100,000                                    |  | 30.2  |
| Age-standardized incidence rate (ASR) per 100,000 (W)               |  | 15.0  |
| Estimated annual change of crude incidence rate latest 10 years (%) |  | 0.7   |
| Estimated annual change of ASR latest 10 years (%)                  |  | -0.6  |
| MORTALITY (average 2009–2013)                                       |  |       |
| Number of deaths per year                                           |  | 49    |
| Percentage of all cancer deaths (%)                                 |  | 1.9   |
| Risk of dying from cancer before age 75 (CR) (%)                    |  | 0.2   |
| Crude mortality rate per 100,000                                    |  | 4.7   |
| Age-standardized mortality rate (ASR) per 100,000 (W)               |  | 1.5   |
| Estimated annual change of crude mortality rate latest 10 years (%) |  | -2.6  |
| Estimated annual change of ASR latest 10 years (%)                  |  | -7.4  |
| PREVALENCE (on December 31, 2013)                                   |  |       |
| Persons living with cancer at the end of 2013 (prevalence)          |  | 4,345 |
| Number of persons living with cancer per 100,000 at the end of 2013 |  | 418.0 |
| 1-year prevalence                                                   |  | 295   |
| 5-year prevalence                                                   |  | 991   |

#### Crude and age-standardized rates per 100,000 women over time.

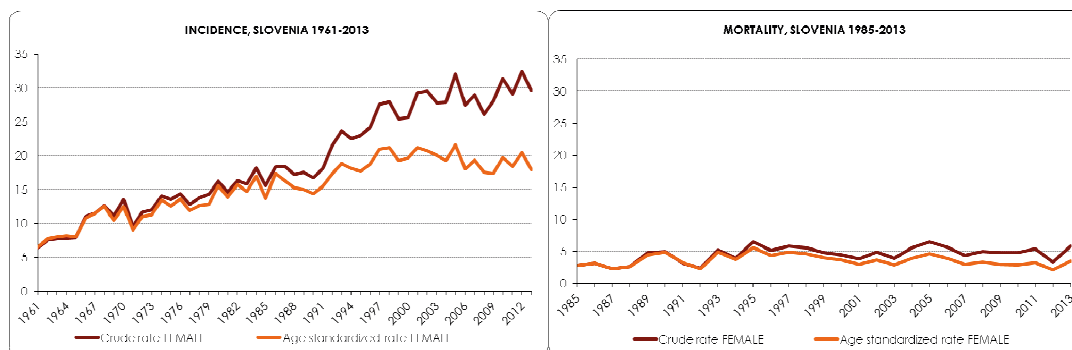

## Supplementary material 15.

## Basic epidemiologic data on cancer

### CERVIX UTERI (C53)

| INCIDENCE (average 2009–2013)                                       |  | Women |
|---------------------------------------------------------------------|--|-------|
| Number of new cases per year                                        |  | 131   |
| Percentage of all cancers (%)                                       |  | 2.2   |
| Frequency rank among all cancers                                    |  | 11th  |
| Percentage of all cancers except non-melanoma skin (%)              |  | 2.7   |
| Risk of getting cancer before age 75 (CR) (%)                       |  | 0.9   |
| Crude incidence rate per 100,000                                    |  | 12.7  |
| Age-standardized incidence rate (ASR) per 100,000 (W)               |  | 8.6   |
| Estimated annual change of crude incidence rate latest 10 years (%) |  | - 5.0 |
| Estimated annual change of ASR latest 10 years (%)                  |  | - 5.8 |
| MORTALITY (average 2009–2013)                                       |  |       |
| Number of deaths per year                                           |  | 44    |
| Percentage of all cancer deaths (%)                                 |  | 1.7   |
| Risk of dying from cancer before age 75 (CR) (%)                    |  | 0.2   |
| Crude mortality rate per 100,000                                    |  | 4.2   |
| Age-standardized mortality rate (ASR) per 100,000 (W)               |  | 2.2   |
| Estimated annual change of crude mortality rate latest 10 years (%) |  | - 1.9 |
| Estimated annual change of ASR latest 10 years (%)                  |  | - 2.5 |
| PREVALENCE (on December 31, 2013)                                   |  |       |
| Persons living with cancer at the end of 2013 (prevalence)          |  | 3,546 |
| Number of persons living with cancer per 100,000 at the end of 2013 |  | 341.1 |
| 1-year prevalence                                                   |  | 113   |
| 5-year prevalence                                                   |  | 385   |

#### Crude and age-standardized rates per 100,000 women over time.

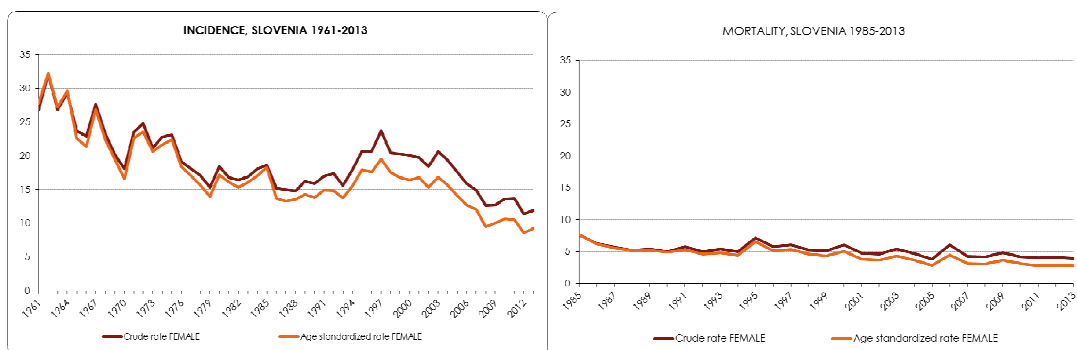



## Supplementary material 16.

## Basic epidemiologic data on cancer

## TESTIS (C62)

| INCIDENCE (average 2009–2013)                                         |  | Men   |
|-----------------------------------------------------------------------|--|-------|
| Number of new cases per year                                          |  | 101   |
| Percentage of all cancers (%)                                         |  | 1.4   |
| Frequency rank among all cancers                                      |  | 13th  |
| Percentage of all cancers except non-melanoma skin (%)                |  | 1.7   |
| Risk of getting cancer before age 75 (CR) (%)                         |  | 0.7   |
| Crude incidence rate per 100,000                                      |  | 9.9   |
| Age-standardized incidence rate (ASR) per 100,000 (W)                 |  | 8.6   |
| Estimated annual change of crude incidence rate latest 10 years (%)   |  | 0.5   |
| Estimated annual change of ASR latest 10 years (%)                    |  | 0.7   |
| MORTALITY (average 2009–2013)                                         |  |       |
| Number of deaths per year                                             |  | 6     |
| Percentage of all cancer deaths (%)                                   |  | 0.2   |
| Risk of dying from cancer before age 75 (CR) (%)                      |  | 0.03  |
| Crude mortality rate per 100,000                                      |  | 0.6   |
| Age-standardized mortality rate (ASR) per 100,000 (W)                 |  | 0.4   |
| Estimated annual change of crude mortality rate latest 10 years (%) * |  | /     |
| Estimated annual change of ASR latest 10 years (%) *                  |  | /     |
| PREVALENCE (on December 31, 2013)                                     |  |       |
| Persons living with cancer at the end of 2013 (prevalence)            |  | 2,121 |
| Number of persons living with cancer per 100,000 at the end of 2013   |  | 208.0 |
| 1-year prevalence                                                     |  | 96    |
| 5-year prevalence                                                     |  | 395   |

\* Annual change is not calculated because of low number of deaths.

## Crude and age-standardized rates per 100,000 men over time.

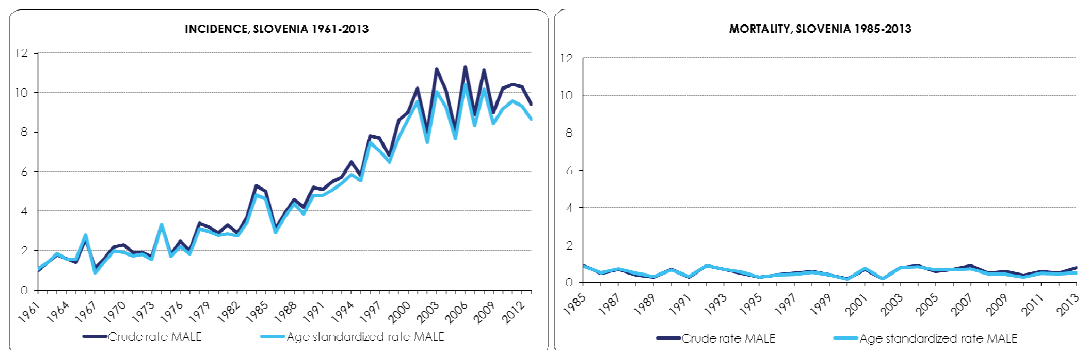

## Supplementary material 17.

**Table of incidence and crude incidence rate of rare, common and unclassified cancers, Slovenia 2004–2013.**

| Primary site                                                                | Number | Incidence rate per 100,000 |
|-----------------------------------------------------------------------------|--------|----------------------------|
| Rare cancers                                                                | 28.768 | 141,66                     |
| Head and neck rare cancers                                                  | 4.505  | 22,18                      |
| Epithelial tumours of nasal cavity and sinuses                              | 114    | 0,56                       |
| Epithelial tumours of nasopharynx                                           | 98     | 0,48                       |
| Epithelial tumours of major salivary glands and salivary-gland type tumours | 276    | 1,36                       |
| Epithelial tumours of hypopharynx and larynx                                | 1.561  | 7,69                       |
| Epithelial tumours of oropharynx                                            | 1.301  | 6,41                       |
| Epithelial tumours of oral cavity and lip                                   | 1.133  | 5,58                       |
| Epithelial tumours of eye and adnexa                                        | 18     | 0,09                       |
| Epithelial tumours of middle ear                                            | 4      | 0,02                       |
| Digestive rare cancers                                                      | 4.021  | 19,80                      |
| Epithelial tumours of oesophagus                                            | 754    | 3,71                       |
| Epithelial tumours of stomach                                               | 363    | 1,79                       |
| Epithelial tumours of small intestine                                       | 103    | 0,51                       |
| Epithelial tumours of colon                                                 | 26     | 0,13                       |
| Epithelial tumours of rectum                                                | 4      | 0,02                       |
| Epithelial tumours of anal canal                                            | 153    | 0,75                       |
| Epithelial tumours of pancreas                                              | 23     | 0,11                       |
| Epithelial tumours of liver and intrahepatic bile tract (ibt)               | 972    | 4,79                       |
| Epithelial tumours of gallbladder and extrahepatic biliary tract (ebt)      | 1.623  | 7,99                       |
| Thoracic rare cancers and mesothelioma                                      | 1.565  | 7,71                       |
| Epithelial tumour of trachea                                                | 48     | 0,24                       |
| Epithelial tumour of lung                                                   | 1.140  | 5,61                       |
| Epithelial tumours of thymus                                                | 35     | 0,17                       |
| Malignant mesothelioma                                                      | 342    | 1,68                       |

Continued →

Figure : Continued.

| Primary site                                    | Number | Incidence rate per 100,000 |
|-------------------------------------------------|--------|----------------------------|
| Breast rare cancers                             | 701    | 3,45                       |
| Epithelial tumours of breast, females           | 601    | 2,96                       |
| Epithelial tumours of breast, males             | 100    | 0,49                       |
| Female genital rare cancers                     | 3.817  | 18,80                      |
| Epithelial tumours of corpus uteri              | 161    | 0,79                       |
| Epithelial tumours of cervix uteri              | 1.404  | 6,91                       |
| Epithelial tumours of ovary and fallopian tube  | 1.693  | 8,34                       |
| Non epithelial tumours of ovary                 | 40     | 0,20                       |
| Epithelial tumours of vulva and vagina          | 517    | 2,55                       |
| Trophoblastic tumour of placenta                | 2      | 0,01                       |
| Male genital rare cancers                       | 1.152  | 5,67                       |
| Epithelial tumours of prostate                  | 47     | 0,23                       |
| Testicular and paratesticular cancers           | 993    | 4,89                       |
| Epithelial tumours of penis                     | 112    | 0,55                       |
| Urogenital rare cancers                         | 517    | 2,55                       |
| Epithelial tumours of kidney                    | 1      | 0,00                       |
| Epithelial tumours of pelvis and ureter         | 418    | 2,06                       |
| Epithelial tumours of urethra                   | 20     | 0,10                       |
| Epithelial tumours of bladder                   | 78     | 0,38                       |
| Rare skin tumors and non-cutaneous melanoma     | 328    | 1,62                       |
| Adnexal carcinoma of skin                       | 102    | 0,50                       |
| Malignant melanoma of mucosa and extracutaneous | 71     | 0,35                       |
| Malignant melanoma of uvea                      | 155    | 0,76                       |
| Rare embrionale tumours                         | 110    | 0,53                       |
| Neuroblastoma and ganglioneuroblastoma          | 15     | 0,07                       |
| Nephroblastoma                                  | 24     | 0,12                       |

Continued →

Figure : Continued.

| Primary site                                           | Number | Incidence rate per 100,000 |
|--------------------------------------------------------|--------|----------------------------|
| Retinoblastoma                                         | 15     | 0,07                       |
| Hepatoblastoma                                         | 4      | 0,02                       |
| Pleuropulmonary blastoma                               | 0      | 0,00                       |
| Pancreatoblastoma                                      | 0      | 0,00                       |
| Olfactory neuroblastoma                                | 8      | 0,04                       |
| Odontogenic malignant tumours                          | 0      | 0,00                       |
| Extragenital germ cell tumours                         | 44     | 0,22                       |
| Rare sarcomas                                          | 1.340  | 6,60                       |
| Soft tissue sarcoma                                    | 881    | 4,34                       |
| Bone sarcoma                                           | 165    | 0,81                       |
| Gastrointestinal stromal sarcoma                       | 278    | 1,37                       |
| Kaposi's sarcoma                                       | 16     | 0,08                       |
| Neuroendocrine rare tumours                            | 961    | 4,70                       |
| Neuroendocrine tumours                                 | 961    | 4,73                       |
| Endocrine organs rare tumours                          | 1.493  | 7,35                       |
| Carcinomas of pituitary gland                          | 2      | 0,01                       |
| Carcinomas of thyroid gland                            | 1.441  | 7,10                       |
| Carcinomas of parathyroid gland                        | 4      | 0,02                       |
| Carcinoma of adrenal cortex                            | 46     | 0,23                       |
| Central nervous system rare tumours                    | 1.221  | 6,01                       |
| Tumours of central nervous system (cns)                | 1.179  | 5,81                       |
| Embryonal tumors of cns                                | 42     | 0,21                       |
| Haematological rare malignancies                       | 6.680  | 32,89                      |
| Lymphoid diseases                                      | 4.224  | 20,80                      |
| Acute myeloid leukemia and related precursor neoplasms | 844    | 4,16                       |
| Myeloproliferative neoplasms                           | 855    | 4,21                       |

Continued →

Figure : Continued.

| Primary site                                                             | Number | Incidence rate per 100,000 |
|--------------------------------------------------------------------------|--------|----------------------------|
| Myelodysplastic syndrome and myelodysplastic/myeloproliferative diseases | 748    | 3,68                       |
| Histiocytic and dendritic cell neoplasms                                 | 9      | 0,04                       |
| Other rare cancers                                                       | 357    | 1,76                       |
| Other rare cancers, unclassified                                         | 357    | 1,76                       |
| Common cancers                                                           | 92.799 | 456,95                     |
| Unclassified sites                                                       | 2.665  | 13,12                      |
| Other poorly defined hematological diseases                              | 61     | 0,30                       |
| Other poorly defined sites / unknown primary sites                       | 2.031  | 10,00                      |
| DCO cases (registered from death certificates only)                      | 573    | 2,82                       |

## Supplementary material 18.

Crude annual incidence rates of rare, common and unclassified cancers by age group with average annual change in last 10 years, Slovenia 2004–2013.

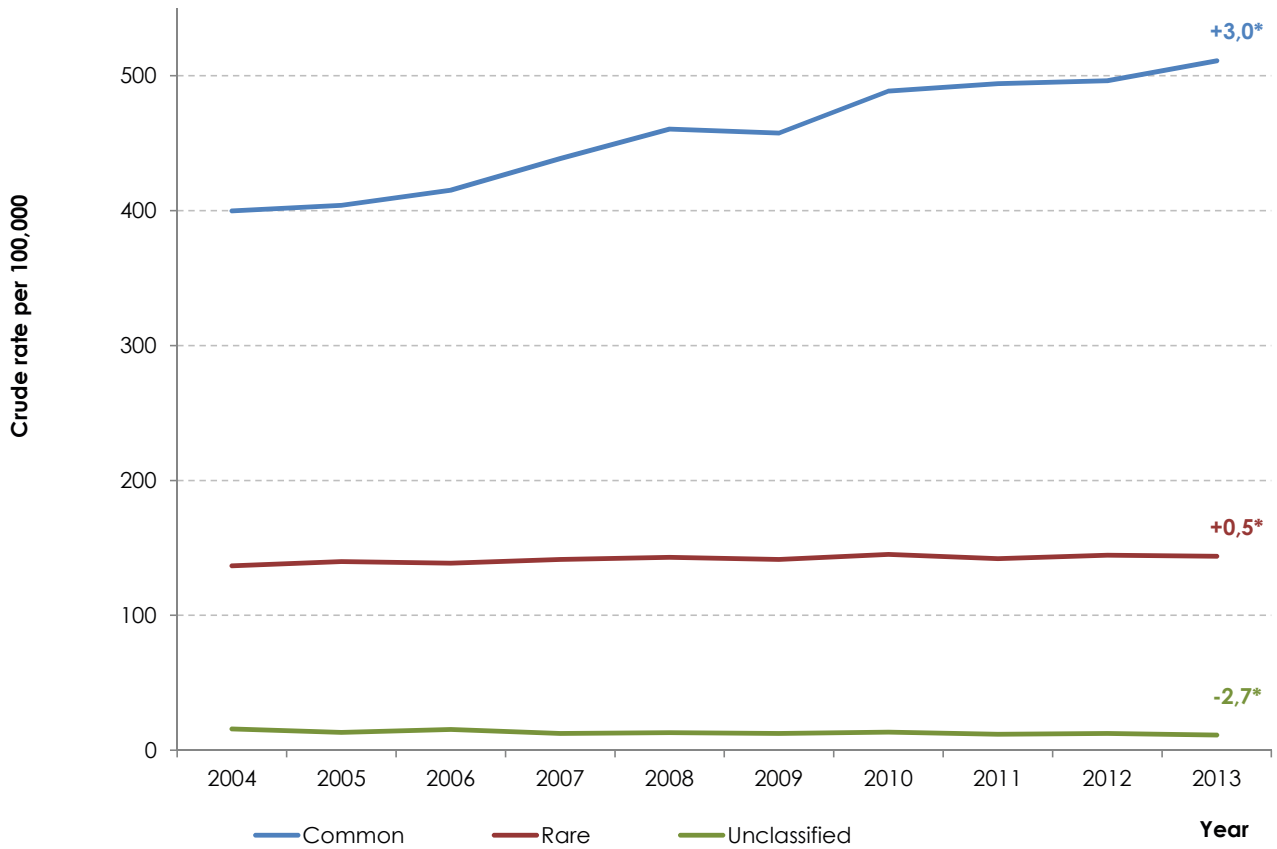

\* Average annual change is statistically significant at 0.05 significance level

## Supplementary material 19.

Table of observed and estimated cancer incidence, Slovenia 2009–2013 and 2016.

| ICD code | Primary site                                         | Sex | Average annual observed values 2009–2013 |                            | Estimation for 2016              |             |                                                      |         |
|----------|------------------------------------------------------|-----|------------------------------------------|----------------------------|----------------------------------|-------------|------------------------------------------------------|---------|
|          |                                                      |     | Number                                   | Incidence rate per 100,000 | Number (95% prediction interval) |             | Incidence rate per 100,000 (95% prediction interval) |         |
| C00–C96  | All sites                                            | M+F | 13237                                    | 645,0                      | 14785                            | 14365–15205 | 716                                                  | 696–737 |
|          |                                                      | M   | 7205                                     | 709,2                      | 8259                             | 7983–8535   | 807                                                  | 780–834 |
|          |                                                      | F   | 6032                                     | 582,1                      | 6527                             | 6210–6843   | 627                                                  | 597–657 |
| C00–C14  | Mouth and pharynx                                    | M   | 273                                      | 26,9                       | 272                              | 229–314     | 27                                                   | 22–31   |
|          |                                                      | F   | 72                                       | 7,0                        | 71                               | 48–94       | 7                                                    | 5–9     |
| C15      | Oesophagus                                           | M   | 69                                       | 6,8                        | 64                               | 43–85       | 6                                                    | 4–8     |
|          |                                                      | F   | 16                                       | 1,5                        | 16                               | 4–27        | 1                                                    | 0–3     |
| C16      | Stomach                                              | M   | 295                                      | 29,1                       | 285                              | 241–329     | 28                                                   | 24–32   |
|          |                                                      | F   | 184                                      | 17,8                       | 180                              | 145–215     | 17                                                   | 14–21   |
| C18      | Colon                                                | M   | 524                                      | 51,6                       | 586                              | 513–658     | 57                                                   | 50–64   |
|          |                                                      | F   | 395                                      | 38,1                       | 414                              | 359–469     | 40                                                   | 35–45   |
| C19–C20  | Rectum and rectosigmoid junction                     | M   | 416                                      | 40,9                       | 440                              | 383–497     | 43                                                   | 37–49   |
|          |                                                      | F   | 235                                      | 22,7                       | 215                              | 174–256     | 21                                                   | 17–25   |
| C22      | Liver and intrahepatic bile ducts                    | M   | 128                                      | 12,6                       | 160                              | 127–193     | 16                                                   | 12–19   |
|          |                                                      | F   | 46                                       | 4,5                        | 48                               | 28–68       | 5                                                    | 3–7     |
| C23–C24  | Gallbladder and biliary tract                        | M   | 69                                       | 6,8                        | 80                               | 55–104      | 8                                                    | 5–10    |
|          |                                                      | F   | 103                                      | 10,0                       | 110                              | 82–138      | 11                                                   | 8–13    |
| C25      | Pancreas                                             | M   | 171                                      | 16,9                       | 221                              | 181–260     | 22                                                   | 18–25   |
|          |                                                      | F   | 175                                      | 16,9                       | 186                              | 149–223     | 18                                                   | 14–21   |
| C32      | Larynx                                               | M   | 92                                       | 9,0                        | 84                               | 60–107      | 8                                                    | 6–11    |
|          |                                                      | F   | 13                                       | 1,3                        | 14                               | 0–40        | 1                                                    | 0–4     |
| C33–C34  | Trachea, bronchus and lung                           | M   | 858                                      | 84,5                       | 806                              | 733–879     | 79                                                   | 72–86   |
|          |                                                      | F   | 391                                      | 37,7                       | 458                              | 403–513     | 44                                                   | 39–49   |
| C43      | Malignant melanoma of skin                           | M   | 246                                      | 24,3                       | 325                              | 217–433     | 32                                                   | 21–42   |
|          |                                                      | F   | 249                                      | 24,0                       | 286                              | 238–333     | 27                                                   | 23–32   |
| C44      | Skin, other malignomas                               | M   | 1141                                     | 112,3                      | 1476                             | 1376–1576   | 144                                                  | 134–154 |
|          |                                                      | F   | 1157                                     | 111,6                      | 1378                             | 1273–1484   | 132                                                  | 122–143 |
| C48–C49  | Connective and soft tissue                           | M   | 29                                       | 2,8                        | 28                               | 14–43       | 3                                                    | 1–4     |
|          |                                                      | F   | 38                                       | 3,6                        | 43                               | 29–57       | 4                                                    | 3–5     |
| C50      | Breast                                               | M   | 13                                       | 1,3                        | 20                               | 7–33        | 2                                                    | 1–3     |
|          |                                                      | F   | 1227                                     | 118,5                      | 1307                             | 1204–1409   | 126                                                  | 116–135 |
| C53      | Cervix uteri                                         | M   | –                                        | –                          | –                                | –           | –                                                    | –       |
|          |                                                      | F   | 131                                      | 12,7                       | 102                              | 77–126      | 10                                                   | 7–12    |
| C54      | Corpus uteri                                         | M   | –                                        | –                          | –                                | –           | –                                                    | –       |
|          |                                                      | F   | 313                                      | 30,2                       | 320                              | 267–372     | 31                                                   | 26–36   |
| C56      | Ovary                                                | M   | –                                        | –                          | –                                | –           | –                                                    | –       |
|          |                                                      | F   | 161                                      | 15,6                       | 152                              | 48–255      | 15                                                   | 5–25    |
| C61      | Prostate                                             | M   | 1458                                     | 143,5                      | 1853                             | 1741–1966   | 181                                                  | 170–192 |
|          |                                                      | F   | –                                        | –                          | –                                | –           | –                                                    | –       |
| C62      | Testis                                               | M   | 101                                      | 9,9                        | 102                              | 75–128      | 10                                                   | 7–13    |
|          |                                                      | F   | –                                        | –                          | –                                | –           | –                                                    | –       |
| C64–C65  | Kidney with renal pelvis                             | M   | 243                                      | 24,0                       | 282                              | 238–326     | 28                                                   | 23–32   |
|          |                                                      | F   | 120                                      | 11,6                       | 137                              | 49–225      | 13                                                   | 5–22    |
| C67      | Bladder                                              | M   | 225                                      | 22,2                       | 247                              | 204–290     | 24                                                   | 20–28   |
|          |                                                      | F   | 82                                       | 7,9                        | 93                               | 62–123      | 9                                                    | 6–12    |
| C70–C72  | Central and autonomic nervous system                 | M   | 81                                       | 8,0                        | 81                               | 57–106      | 8                                                    | 6–10    |
|          |                                                      | F   | 68                                       | 6,5                        | 71                               | 53–89       | 7                                                    | 5–9     |
| C73      | Thyroid gland                                        | M   | 40                                       | 4,0                        | 52                               | 31–72       | 5                                                    | 3–7     |
|          |                                                      | F   | 112                                      | 10,8                       | 116                              | 94–138      | 11                                                   | 9–13    |
| C81      | Hodgkin's disease                                    | M   | 24                                       | 2,4                        | 18                               | 6–30        | 2                                                    | 1–3     |
|          |                                                      | F   | 25                                       | 2,5                        | 22                               | 11–33       | 2                                                    | 1–3     |
| C82–C85  | Non-Hodgkin's lymphoma                               | M   | 169                                      | 16,6                       | 208                              | 107–309     | 20                                                   | 10–30   |
|          |                                                      | F   | 167                                      | 16,2                       | 202                              | 94–309      | 19                                                   | 9–30    |
| C90      | Multiple myeloma and malignant plasma cell neoplasms | M   | 65                                       | 6,4                        | 77                               | 53–100      | 7                                                    | 5–10    |
|          |                                                      | F   | 65                                       | 6,3                        | 74                               | 46–103      | 7                                                    | 4–10    |
| C91–C95  | Leukaemias                                           | M   | 153                                      | 15,0                       | 170                              | 143–197     | 17                                                   | 14–19   |
|          |                                                      | F   | 112                                      | 10,8                       | 123                              | 91–155      | 12                                                   | 9–15    |
